# Supplementary material for: HPLC-UV-MS Profiles of Phenolic Compounds and Antioxidant Activity of Fruits from Three Citrus Species Consumed in Northern Chile
Source: PubMed Central journal article supplement (PMC6271594; doi:10.3390/molecules191117400), 2014-10-29

## Supplementary Materials

**Table S1.** Total Phenolic Content (TPC), Total Flavonoid Content (TFC), Ascorbic acid Content (AA), Scavenging of the 1,1-diphenyl-2-picrylhydrazyl Radical (DPPH), Ferric Reducing Antioxidant Power (FRAP), Superoxide Anion scavenging activity (SA), and Extraction Yields of Three Edible Citrus Fruits from the II Region of Chile.

| Species and Plant Part    | TPC (mg/g) <sup>a</sup> | TFC (mg/g) <sup>b</sup> | AA (mg/g) <sup>γ</sup> | DPPH (IC <sub>50</sub> , μg/mL) <sup>δ</sup> | FRAP(μmol/g) <sup>ε</sup> | SA (mg/g) <sup>ο</sup> | w/w Extraction Yield(%) <sup>μ</sup> |
|---------------------------|-------------------------|-------------------------|------------------------|----------------------------------------------|---------------------------|------------------------|--------------------------------------|
| <i>Pica peel (ppe)</i>    | 34.59 ± 0.81            | 23.06 ± 1.57            | 36.19 ± 0.38           | 10.34 ± 1.23p                                | 120.63 ± 2.45             | 76.63 ± 2.14x          | 0.76                                 |
| <i>Pica pulp (ppu)</i>    | 18.58 ± 0.62            | 11.71 ± 1.62abe         | 49.49 ± 0.32           | 12.98 ± 1.45p                                | 112.31 ± 1.13             | 65.05 ± 1.49pqr        | 0.62                                 |
| <i>Genova peel (gepe)</i> | 22.69 ± 1.23            | 13.44 ± 1.22c           | 34.21 ± 1.77           | 20.11 ± 1.32q                                | 86.5 ± 1.07z              | 63.3 ± 2.0rstw         | 0.63                                 |
| <i>Genova pulp (gepu)</i> | 9.47 ± 0.92             | 8.37 ± 0.89adf          | 60.13 ± 1.28           | 27.37 ± 1.42u                                | 74.78 ± 0.48              | 59.03 ± 1.96vw         | 0.54                                 |
| <i>Sutil peel (supe)</i>  | 25.58 ± 1.02            | 15.5 ± 1.03bcde         | 42.38 ± 1.21           | 16.59 ± 1.18r                                | 98.79 ± 1.45              | 67.30 ± 1.38ps         | 0.91                                 |
| <i>Sutil pulp (supu)</i>  | 14.66 ± 1.10            | 11.13 ± 0.96f           | 56.53 ± 1.06           | 18.73 ± 1.22qr                               | 92.02 ± 1.14              | 60.35 ± 0.91qtv        | 0.69                                 |
| GA <sup>ϕ</sup>           | -                       | -                       | -                      | 6.61 ± 0.23                                  | 148.12 ± 2.21             | 94.39 ± 1.98           | -                                    |
| Rutin <sup>ϕ</sup>        | -                       | -                       | -                      | 24.05 ± 0.85u                                | 84.6 ± 1.20z              | 76.85 ± 1.71x          | -                                    |

<sup>a</sup> Total phenolic content (TPC) expressed as mg gallic acid/g dry weight. <sup>b</sup> Total flavonoid content (TFC) expressed as mg quercetin/g dry weight. <sup>γ</sup> Ascorbic acid content expressed as mg vitamin C/g dry weight. <sup>δ</sup> Antiradical DPPH activities are expressed as IC<sub>50</sub> in μg/mL for extracts and compounds. <sup>ϕ</sup> Used as standard antioxidant. <sup>ε</sup> Expressed as μM trolox equivalents/g dry weight. <sup>ο</sup> Expressed in percentage scavenging of superoxide anion at 100 μg/mL. <sup>μ</sup> Extraction yields expressed in percent W/W extraction after SPE, on the basis of fresh material. Values in the same column marked with the same letter are not significantly different (at  $p < 0.05$ ).

(Abbreviations: ppe: pica peel, ppu: pica pulp, supe: sutil peel, supu: sutil pulp, gepe: genova peel; gepu: genova pulp, GA: gallic acid).

**Figure S1.** Correlation curves between TPC and DPPH.

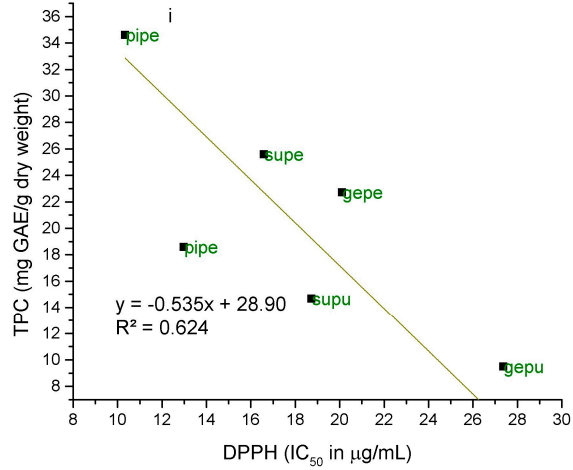

**Figure S2.** Correlation curves between TFC and DPPH.

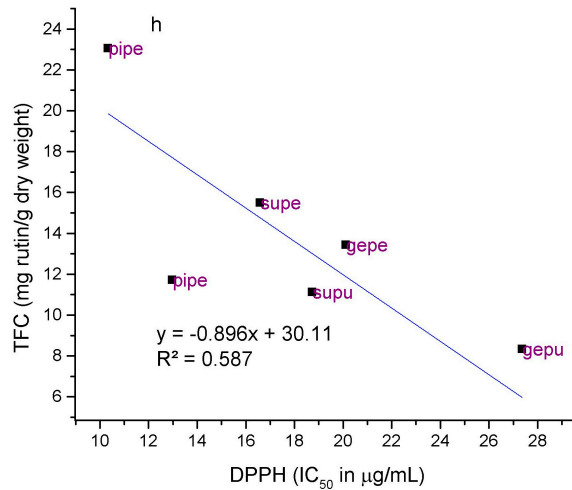

**Figure S3.** Correlation curves between DPPH and SA.

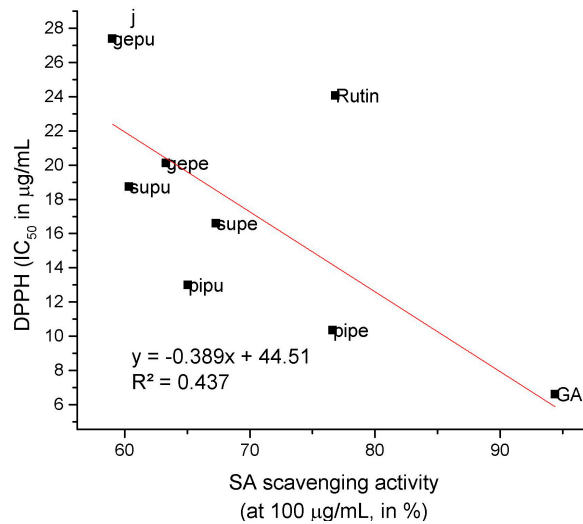

**Figure S4.** Correlation curves between FRAP and SA.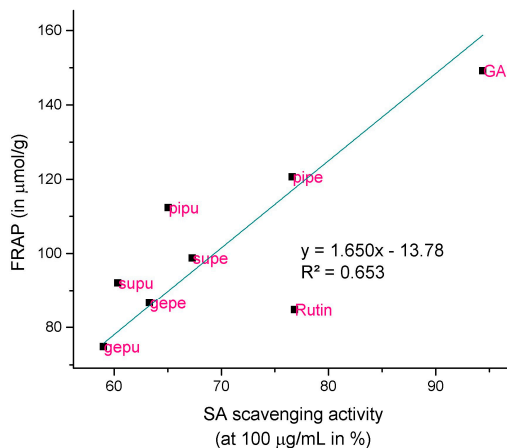**Figure S5.** Correlation curves between DPPH and FRAP.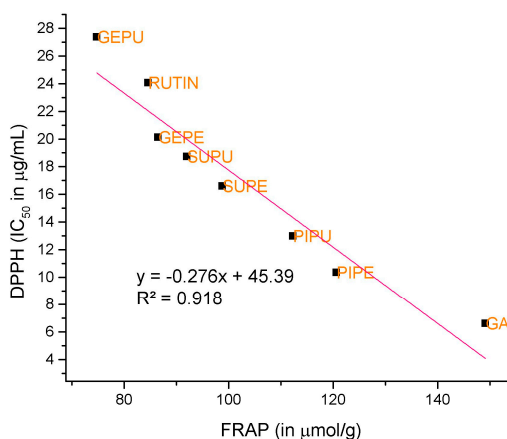

**Figure S6.** Zoom of the chromatograms of Pica lemon extracts. Pica peel (upper chromatogram) and Pica pulp (lower chromatogram). Major compounds detected in this species are: Eriodictyol-4'-*O*-neohesperidoside-7-*O*-glucoside (compound **6**), Eriodictyol-7-*O*-neohesperidoside (**13**), Luteolin 7-*O*-rutinoside (**14**), Hesperidin (**22**), Isorhamnetin-3-*O*-glucoside (**24**), orientin (**27**), Apigenin (**39**), luteolin (**40**).

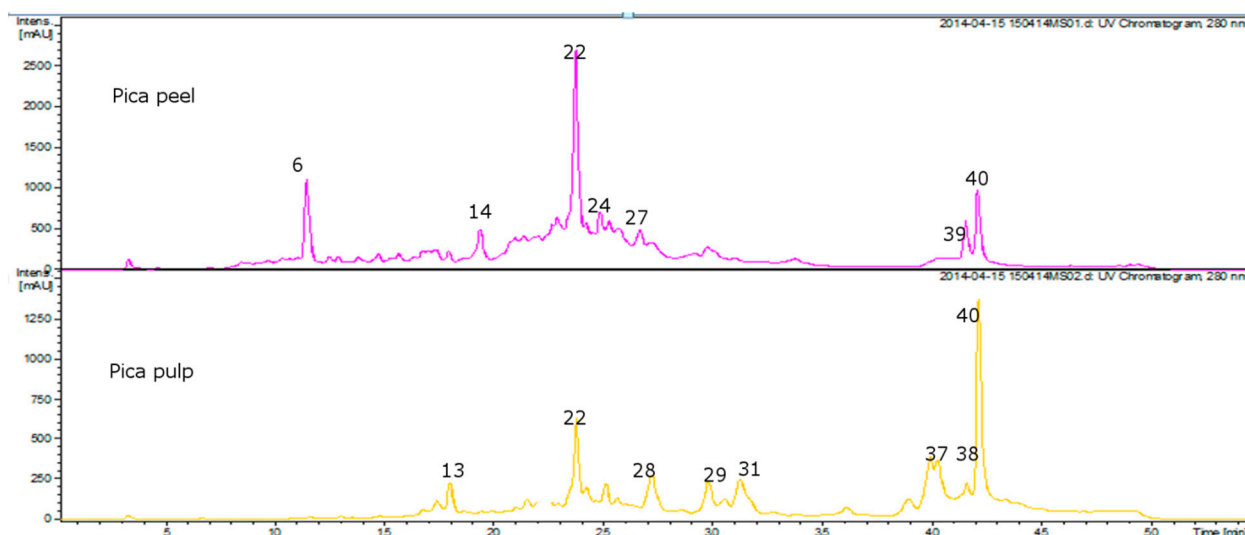

**Figure S7.** Zoom of the chromatograms of Genova lemon extracts. Genova peel (upper chromatogram) and Genova pulp (lower chromatogram). Major compounds detected in this species are: Diosmin (compound **16**), Vicenin-2 (**20**), Hesperidin (**22**), Apigenin (**39**), luteolin (**40**).

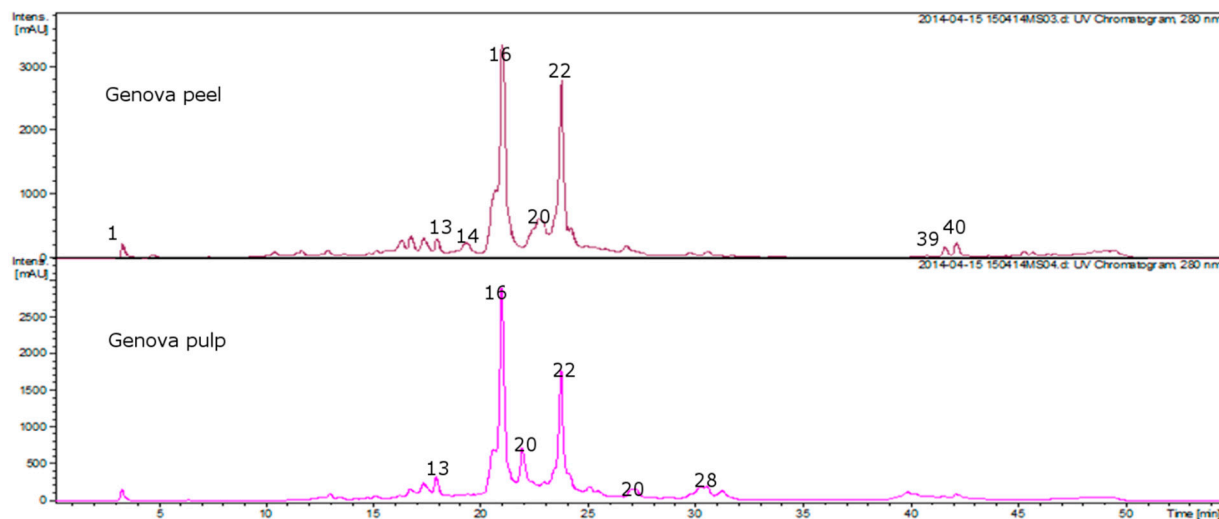

**Figure S8.** Zoom of the chromatograms of Sutil lemon extracts. Sutil peel (upper chromatogram) and Sutil pulp (lower chromatogram). Major compounds detected in this species are: Eriodictyol-4'-*O*-neohesperidoside-7-*O*-glucoside (compound **6**), 3-(2-hydroxy-4-methoxyphenyl)-propanoic acid hexose (**11**), diosmin (compound **16**), hesperidin (**22**), diosmetin (**37**), eriodictyol (**38**), apigenin (**39**), luteolin (**40**).

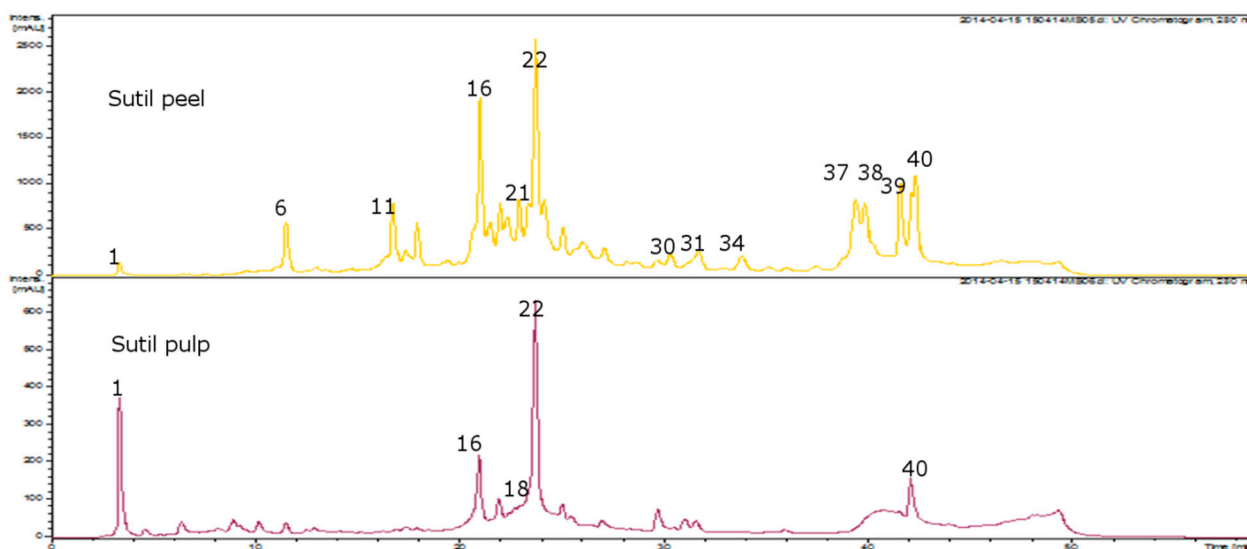

Supplement: molecules-19-17400-s001.pdf [file molecules-19-17400-s001.pdf]
